# Supplementary material
Source: Royal Society of Chemistry journal article supplement (doi:10.1039/d6en00031b)
Supplement: d6en00031b1.pdf [file d6en00031b1.pdf]

**Table S1** The soil information

| Type                                                  | pH   | Soil particle                                        |        |                              | The total amount of heavy metals (mg·kg <sup>-1</sup> ) |                                               |       |                                                      |        |
|-------------------------------------------------------|------|------------------------------------------------------|--------|------------------------------|---------------------------------------------------------|-----------------------------------------------|-------|------------------------------------------------------|--------|
|                                                       |      | Sand                                                 | Silt   | Clay                         | Cu                                                      | Zn                                            | As    | Cd                                                   | Pb     |
| yellow<br>brown soil                                  | 8.47 | 33.95%                                               | 62.80% | 3.24%                        | 62.10                                                   | 897.69                                        | 54.89 | 1.97                                                 | 252.21 |
| The effective state of<br>iron (mg·kg <sup>-1</sup> ) |      | Cation exchange<br>capacity (cmol·kg <sup>-1</sup> ) |        | Soil moisture<br>content (%) |                                                         | Total organic<br>carbon (g·kg <sup>-1</sup> ) |       | Dissolved<br>organic carbon<br>(g·kg <sup>-1</sup> ) |        |
|                                                       | 3.47 | 11.66                                                |        | 23.43                        |                                                         | 54.98                                         |       | 31.89                                                |        |

**Table S2** Taxonomic annotation results of species

| <b>Name</b> | <b>domain</b> | <b>phylum</b> | <b>class</b> | <b>order</b> | <b>family</b> | <b>genus</b> | <b>species</b> |
|-------------|---------------|---------------|--------------|--------------|---------------|--------------|----------------|
| CK          | 50            | 35            | 125          | 309          | 667           | 2711         | 116            |
| T1          | 67            | 47            | 146          | 285          | 1074          | 2922         | 154            |
| T2          | 23            | 18            | 83           | 195          | 564           | 2044         | 106            |

**Table S3** Table of taxonomic unit statistics for different treatment groups

| <b>Name</b> | <b>domain</b> | <b>phylum</b> | <b>class</b> | <b>order</b> | <b>family</b> | <b>genus</b> | <b>species</b> |
|-------------|---------------|---------------|--------------|--------------|---------------|--------------|----------------|
| CK          | 1             | 20            | 54           | 111          | 168           | 250          | 67             |
| T1          | 1             | 19            | 51           | 106          | 165           | 262          | 86             |
| T2          | 1             | 22            | 59           | 122          | 190           | 295          | 77             |

**Table S4** Average relative abundances of bacterial at phylum level in different treatments

| <b>Name</b>             | <b>CK</b> | <b>T1</b> | <b>T2</b> |
|-------------------------|-----------|-----------|-----------|
| <i>Actinobacteria</i>   | 56.94%    | 63.99%    | 72.62%    |
| <i>Proteobacteria</i>   | 23.44%    | 20.81%    | 10.87%    |
| <i>Firmicutes</i>       | 6.87%     | 6.78%     | 9.06%     |
| <i>Chloroflexi</i>      | 4.89%     | 2.49%     | 3.59%     |
| <i>Acidobacteria</i>    | 3.55%     | 2.28%     | 1.61%     |
| <i>Gemmatimonadetes</i> | 2.44%     | 1.70%     | 0.62%     |
| <i>Rokubacteria</i>     | 0.96%     | 0.49%     | 0.77%     |
| <i>Bacteroidetes</i>    | 0.27%     | 0.77%     | 0.24%     |
| <i>Patescibacteria</i>  | 0.10%     | 0.13%     | 0.24%     |
| <i>Nitrospirae</i>      | 0.10%     | 0.05%     | 0.05%     |

**Table S5** Average relative abundances of bacterial at genus level in different treatments

| <b>Name</b>         | <b>CK</b> | <b>T1</b> | <b>T2</b> |
|---------------------|-----------|-----------|-----------|
| <i>Nocardioides</i> | 12.83%    | 17.32%    | 20.73%    |
| <i>Bacillus</i>     | 5.49%     | 5.11%     | 5.82%     |
| <i>Sphingomonas</i> | 10.09%    | 4.19%     | 0.14%     |
| <i>Marmoricola</i>  | 2.37%     | 2.39%     | 7.09%     |
| <i>67-14</i>        | 4.00%     | 1.56%     | 1.26%     |
| <i>Rhodococcus</i>  | 3.94%     | 0.96%     | 0.59%     |
| <i>Ramlibacter</i>  | 1.82%     | 2.13%     | 0.61%     |
| <i>Gaiella</i>      | 2.53%     | 0.98%     | 0.73%     |
| <i>Microvirga</i>   | 1.42%     | 2.73%     | 0.05%     |
| <i>Streptomyces</i> | 2.15%     | 1.46%     | 0.45%     |

**Table S6** Analysis of differences between groups by Adonis

| Name      | Df | SumsOfSqs | MeanSqs  | F.Model   | R <sup>2</sup> | Pr(>F) |
|-----------|----|-----------|----------|-----------|----------------|--------|
| Treat1    | 2  | 1.654418  | 0.827209 | 11.810775 | 0.611616       | 0.001  |
| Residuals | 15 | 1.050577  | 0.070038 | NaN       | 0.388384       | NaN    |
| Total     | 17 | 2.704995  | NaN      | NaN       | 1              | NaN    |

**Table S7** Lefse results

| Name                                                                                               | Abundance | Group | LDA score | P value |
|----------------------------------------------------------------------------------------------------|-----------|-------|-----------|---------|
| <i>Bacteria.Actinobacteria.Actinobacteria.Streptomyces</i>                                         | 4.33852   | CK    | 3.93019   | 0.00051 |
| <i>Bacteria.Actinobacteria.Thermoleophilia.Gaiellales.Gaiellaceae.Gaiella</i>                      | 4.40374   | CK    | 3.95709   | 0.00091 |
| <i>Bacteria.Actinobacteria.Acidimicrobiia</i>                                                      | 4.54048   | CK    | 3.94438   | 0.00294 |
| <i>Bacteria.Actinobacteria.Thermoleophilia</i>                                                     | 5.06777   | CK    | 4.61275   | 0.00051 |
| <i>Bacteria.Chloroflexi.KD4_96.KD4_96.KD4_96.KD4_96</i>                                            | 4.31198   | CK    | 3.81568   | 0.00255 |
| <i>Bacteria.Acidobacteria</i>                                                                      | 4.54963   | CK    | 3.98171   | 0.00063 |
| <i>Bacteria.Proteobacteria</i>                                                                     | 5.37000   | CK    | 4.79988   | 0.00234 |
| <i>Bacteria.Proteobacteria.Alphaproteobacteria</i>                                                 | 5.22731   | CK    | 4.76585   | 0.00168 |
| <i>Bacteria.Actinobacteria.Thermoleophilia.Gaiellales.Gaiellaceae</i>                              | 4.40374   | CK    | 3.95709   | 0.00091 |
| <i>Bacteria.Proteobacteria.Alphaproteobacteria.Sphingomonadales.Sphingomonadaceae</i>              | 5.03409   | CK    | 4.71877   | 0.00051 |
| <i>Bacteria.Gemmatimonadetes.Gemmatimonadetes.Gemmatimonadales.Gemmatimonadaceae</i>               | 4.35795   | CK    | 3.92982   | 0.00051 |
| <i>Bacteria.Gemmatimonadetes.Gemmatimonadetes.Gemmatimonadales</i>                                 | 4.35795   | CK    | 3.92982   | 0.00051 |
| <i>Bacteria.Chloroflexi.KD4_96.KD4_96.KD4_96</i>                                                   | 4.31198   | CK    | 3.81568   | 0.00255 |
| <i>Bacteria.Chloroflexi</i>                                                                        | 4.68963   | CK    | 4.06918   | 0.00051 |
| <i>Bacteria.Proteobacteria.Alphaproteobacteria.Sphingomonadales.Sphingomonadaceae.Sphingomonas</i> | 5.00407   | CK    | 4.69396   | 0.00051 |
| <i>Bacteria.Actinobacteria.Actinobacteria.Streptomyces.Streptomyces</i>                            | 4.33227   | CK    | 3.92317   | 0.00051 |
| <i>Bacteria.Actinobacteria.Actinobacteria.Corynebacteriales</i>                                    | 4.72017   | CK    | 4.31070   | 0.00340 |
| <i>Bacteria.Actinobacteria.Actinobacteria.Streptomyces.Streptomyces</i>                            | 4.33852   | CK    | 3.93019   | 0.00051 |
| <i>Bacteria.Proteobacteria.Alphaproteobacteria.Sphingomonadales</i>                                | 5.03409   | CK    | 4.71877   | 0.00051 |
| <i>Bacteria.Actinobacteria.Thermoleophilia.Solirubrobacterales.67_14</i>                           | 4.60167   | CK    | 4.13580   | 0.00108 |
| <i>Bacteria.Actinobacteria.Actinobacteria.Corynebacteriales.Nocardiaceae</i>                       | 4.60449   | CK    | 4.21611   | 0.00340 |

|                                                                                                       |         |    |         |         |
|-------------------------------------------------------------------------------------------------------|---------|----|---------|---------|
| <i>Bacteria.Actinobacteria.Thermoleophilia.Gaiellales</i>                                             | 4.69671 | CK | 4.27053 | 0.00051 |
| <i>Bacteria.Gemmatimonadetes.Gemmatimonadetes</i>                                                     | 4.35795 | CK | 3.92982 | 0.00051 |
| <i>Bacteria.Actinobacteria.Actinobacteria.Corynebacteriales.Nocardiaceae.Rhodococcus</i>              | 4.59526 | CK | 4.21514 | 0.00340 |
| <i>Bacteria.Actinobacteria.Thermoleophilia.Solirubrobacterales.67_14.67_14</i>                        | 4.60167 | CK | 4.13580 | 0.00108 |
| <i>Bacteria.Chloroflexi.KD4_96.KD4_96</i>                                                             | 4.31198 | CK | 3.81568 | 0.00255 |
| <i>Bacteria.Actinobacteria.Thermoleophilia.Solirubrobacterales</i>                                    | 4.79047 | CK | 4.32340 | 0.00051 |
| <i>Bacteria.Chloroflexi.KD4_96</i>                                                                    | 4.31198 | CK | 3.81568 | 0.00255 |
| <i>Bacteria.Proteobacteria.Alphaproteobacteria.Rhizobiales.Xanthobacteraceae</i>                      | 4.22676 | T1 | 3.81568 | 0.00051 |
| <i>Bacteria.Proteobacteria.Alphaproteobacteria.Rhizobiales</i>                                        | 4.88550 | T1 | 4.44849 | 0.00051 |
| <i>Bacteria.Proteobacteria.Alphaproteobacteria.Rhizobiales.Beijerinckiaceae</i>                       | 4.56167 | T1 | 4.26282 | 0.00051 |
| <i>Bacteria.Proteobacteria.Gammaproteobacteria.Betaproteobacteriales.Burkholderiaceae.Ramlibacter</i> | 4.32757 | T1 | 3.88138 | 0.00812 |
| <i>Bacteria.Proteobacteria.Alphaproteobacteria.Rhizobiales.Beijerinckiaceae.Microvirga</i>            | 4.43539 | T1 | 4.14754 | 0.00063 |
| <i>Bacteria.Actinobacteria.Actinobacteria.Micrococcales.Intrasporangiaceae</i>                        | 4.61530 | T1 | 4.04263 | 0.00212 |
| <i>Bacteria.Actinobacteria.Actinobacteria.Micrococcales.Micrococcaceae.Paenarthrobacter</i>           | 4.36060 | T2 | 4.04315 | 0.00051 |
| <i>Bacteria.Actinobacteria.Actinobacteria.Micrococcales.Micrococcaceae.Arthrobacter</i>               | 4.27182 | T2 | 3.96538 | 0.00051 |
| <i>Bacteria.Actinobacteria.Actinobacteria.Propionibacteriales.Nocardioideaceae.Marmoricola</i>        | 4.85053 | T2 | 4.36906 | 0.00340 |
| <i>Bacteria.Actinobacteria</i>                                                                        | 5.86107 | T2 | 4.89146 | 0.00186 |
| <i>Bacteria.Actinobacteria.Actinobacteria.Micrococcales.Micrococcaceae</i>                            | 5.42922 | T2 | 4.99824 | 0.00127 |
| <i>Bacteria.Actinobacteria.Actinobacteria</i>                                                         | 5.82315 | T2 | 5.11724 | 0.00051 |
| <i>Bacteria.Actinobacteria.Actinobacteria.Propionibacteriales.Nocardioideaceae</i>                    | 5.50193 | T2 | 4.79919 | 0.00294 |
| <i>Bacteria.Actinobacteria.Actinobacteria.Propionibacteriales.Nocardioideaceae.Nocardioides</i>       | 5.31660 | T2 | 4.58349 | 0.00141 |

---

|                                                                                                                       |         |    |         |         |
|-----------------------------------------------------------------------------------------------------------------------|---------|----|---------|---------|
| <i>Bacteria.Firmicutes.Bacilli.Bacillales.Planococcaceae</i>                                                          | 4.15433 | T2 | 3.82217 | 0.00310 |
| <i>Bacteria.Actinobacteria.Actinobacteria.Propionibacteriales</i>                                                     | 5.50317 | T2 | 4.80074 | 0.00294 |
| <i>Bacteria.Actinobacteria.Actinobacteria.Micrococcales.Micrococcaceae.Arthrobacter.Arthrobacter_crystallopoietes</i> | 4.19569 | T2 | 3.89835 | 0.00044 |
| <i>Bacteria.Actinobacteria.Actinobacteria.Micrococcales</i>                                                           | 5.49261 | T2 | 5.00721 | 0.00212 |

---

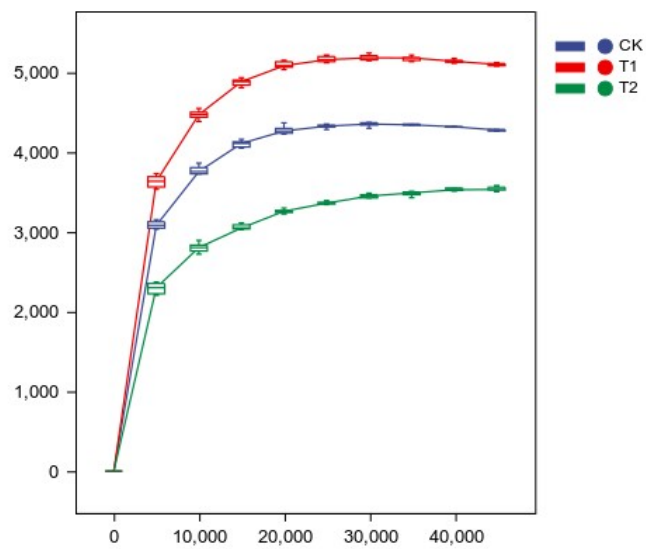

**Fig. S1** The species accumulation and diversity curves of different treatments

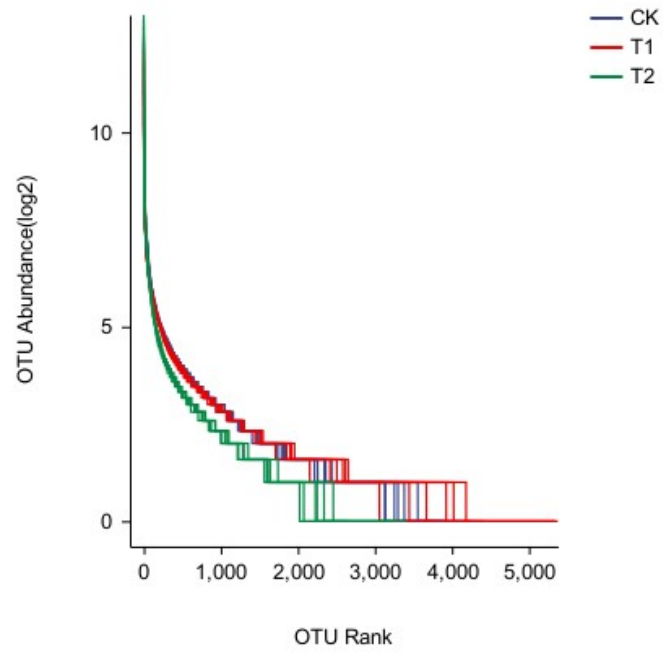

**Fig. S2** Rank abundance curves
